# Supplementary material for: Comparison of six statistical methods for interrupted time series studies: empirical evaluation of 190 published series
Source: BMC Med Res Methodol. 2021 Jun 26;21:134. doi: 10.1186/s12874-021-01306-w (PMC8235830; doi:10.1186/s12874-021-01306-w)
Supplement: Supplementary file 1 — Additional file 1. Analysis code [file 12874_2021_1306_MOESM1_ESM.docx]

# Additional File 1: analysis code

The following sections contain Stata 15 do files that analyse the data sets used in the study “Comparison of six statistical methods for interrupted time series studies: empirical evaluation of 190 published series”

Simon L Turner1, Amalia Karahalios1, Andrew B Forbes1, Monica Taljaard2,3, Jeremy M Grimshaw2,3,4, Joanne E McKenzie1*

1School of Public Health and Preventive Medicine, Monash University, Melbourne, Victoria, Australia.

2Clinical Epidemiology Program, Ottawa Hospital Research Institute, Ottawa, Ontario, Canada. 1053 Carling Ave, Ottawa.

3School of Epidemiology and Public Health, University of Ottawa, Ottawa, Ontario, Canada. 600 Peter Morand Crescent, Ottawa, Ontario K1G 5Z3.

4Department of Medicine, University of Ottawa, Ottawa, Ontario, Canada. Roger Guindon Hall, 451 Smyth Rd.

The following do files are required:

| Name of file | Purpose |
| --- | --- |
| 001_master_empirical_evaluation.do | Contains instructions on the running of the analysis and calls the subsequent do files |
| empirical_all_methods_published.do | Analyses each data series using a range of statistical methods and saves the results of each method in a separate .dta file |
| combine_methods_published.do | Combines the results from each statistical method into a single .dta file |
| get_wanted_empirical_estimates_published.do | The final data required does not include segments such as those used for transition periods, this do file selects the effect estimates used for the final summaries |

- 1. Data file 1: 001_master_empirical_evaluation.do

////////////////////////////////////////////////////////////////////////////////

// Master Empirical Evaluation final file

// Simon Turner

// For the study:

// "Comparison of six statistical methods for interrupted time series studies: empirical evaluation of 190 published series"

// Turner SL, Karahalios A, Forbes AB, Taljaard M, Grimshaw JM, McKenzie JE.

//

// This do file calls multiple other do files to:

//

// analyse each dataset using multiple statistical methods (empirical_all_methods_published.do)

// save level changes, slope changes, SEs, p-values and autocorrelation estimates

// combine all the results from the different methods (combine_methods_published.do)

// and choose the estimate wanted for analysis (get_wanted_empirical_estimates_published.do)

// the final file used for the manuscript (including graphs) is empirical_estimates.dta

//

// required data are found in the two excel files:

// STurner_Empirical_study_information.xls

// which contains information about the studies

// also

// STurner_Empirical_time_series.xls

// which contains the actual time series data

//

// further details about the variables can be found in:

// STurner_Empirical_Data_Dictionary.xls

////////////////////////////////////////////////////////////////////////////////

// firstly set the working directory...

global dir "<set directory>"

cd "$dir"

version 15

////////////////////////////////////////////////////////////////////////////////

// analyse the datasets

// now use different methods and capture the outputs

do ${dir}empirical_all_methods_published

// combine the results from the different methods

do ${dir}combine_methods_published

// for the empirical study we only want to use a subset of the total datasets

// this next section obtains the wanted datasets

do ${dir}get_wanted_empirical_estimates_published

////////////////////////////////////////////////////////////////////////////////

// The final file we can use for graphing, tables etc. is called:

// empirical_estimates_published.dta

////////////////////////////////////////////////////////////////////////////////

- 1. Data file 2: empirical_all_methods_published.do

////////////////////////////////////////////////////////////////////////////////

// This is the analysis file for the empirical study:

// "Comparison of six statistical methods for interrupted time series studies: empirical evaluation of 190 published series"

// loads the datasets,

// analyses each using a variety of statistical methods

// finally it saves the analysed data in "estimates_published_`model_type'"

// where `model_type' is one of the statistical methods used

// load the data that is ready for analysis

import excel "STurner_Empirical_time_series.xls", sheet("Sheet1") firstrow clear

// ensure that there is a proper study id

levelsof series_id, local(series_ids)

// there are several alternatives for scaling

// no scaling (just leave this blank)

// scaling by the rmse for the first segment only, use "rmse_on"

// or scaling by the rmse of the whole series, use "rmse_full"

// some of the datasets are very short (three points in pre-series) so first segment scaling does not work

// scaling by the full rmse was used for the analysis

local rmse_full = "rmse_full"

////////////////////////////////////////////////////////////////////////////////

// this short program estimates autocorrelation from the residuals after a

// simple linear regression

// this was not used in the analysis, but served as an interesting reference

cap program drop find_rho

program find_rho

syntax varlist [if]

marksample touse

quietly regress `varlist' l.`varlist' if `touse' , nocons

local rho=_b[L.`varlist']

scalar rho = `rho'

end

cap program drop find_rho_wrap

program find_rho_wrap

syntax varlist [if]

marksample touse

tempvar resid

regress `varlist' if `touse'

predict double `resid', resid

find_rho `resid' if `touse'

end

////////////////////////////////////////////////////////////////////////////////

// we investigated a range of statistical methods

// this string links to the sections below to identify which methods

// are going to be used here

// regress - OLS

// newey - OLS with newey-west standard errors

// prais - prais-winsten with an iterative search

// prais_raw - simple prais-winsten

// corc - cochrane-orcutt

// mixed - REML

// mixed_satt - REML with the Satterthwaite small series adjustment

// arima - ARIMA with lag-1

// for the final study we restricted these to the following...

local model_types "regress newey prais_raw mixed mixed_satt arima"

// loop over each statistical method

foreach model_type of local model_types {

// set the end file name

local save_name "estimates_published_`model_type'.dta"

// set up the temporary file used to store the data

// we are saving data per segment

// the level change and slope change with CIs, SEs and p-values

// autocorrelation estimates, degrees of freedom etc.

tempname post_values_`model_type'

postfile `post_values_`model_type'' series_id ///

str20 model_type ///

segment analysis_autocorr analysis_effects segment_num_points total_num_points rmse ///

level level_ll level_ul level_se level_p ///

slope slope_ll slope_ul slope_se slope_p ///

rho_est rho_cil rho_ciu ///

num_iterations error_code converged ///

lincom_level_dof lincom_slope_dof ///

using "`save_name'" , replace

// now for each of the data sets...

foreach series_id of local series_ids {

// going to just use one at a time

preserve

keep if series_id == `series_id'

local series_id = series_id[1]

display "working through `series_id'"

////////////////////////////////////////////////////////////////////////////

// set for program

*keep outcome time segment segment_in_analysis

sort time

drop if time == .

////////////////////////////////////////////////////////////////////////////////

// find times programatically

// this goes through and works out the timing of each segment

summ segment

local num_segments = r(max)

local min_seg_num = r(min)

if `min_seg_num' != 0 {

replace segment = segment - `min_seg_num'

}

summ segment

local num_segments = r(max)

local min_seg_num = r(min)

forvalues segment = 0/`num_segments' {

summ time if segment == `segment'

local time_`segment'_start = r(min)

local time_`segment'_end = r(max)

display "segment `segment' goes from `time_`segment'_start' to `time_`segment'_end'"

}

////////////////////////////////////////////////////////////////////////////////

// extra variables for analysis

// generate variables to indicate time of intervention

forvalues segment = 0/`num_segments' {

gen intervention_`segment' = 0

replace intervention_`segment' = 1 if segment >= `segment'

gen level_change_`segment' = intervention_`segment'

gen slope_change_`segment' = (time-`time_`segment'_start')*level_change_`segment'

}

////////////////////////////////////////////////////////////////////////////////

// model

////////////////////////////////////////////////////////////////////////////////

// create the variables to use (the various level and slope changes)

// starting with level_0 and slope_0, then incrementing for each segment

// e.g. regular segmented regression will have

// level_0 (intercept) slope_0 (pre-interruption slope) level_1 (level change at interruption) slope_1 (slope change post interruption)

local variables = ""

forvalues segment = 0/`num_segments' {

local variables = "`variables'" + " level_change_`segment' slope_change_`segment'"

}

display "variables: `variables'"

display "study: `year' number: `number_in_year' multiple: `multiple' data_type: `data_type'"

// first find rmse from all segments (for scaling)

regress outcome `variables', nocons

local rmse = e(rmse)

local total_num_points = e(N)

///////////////////////////////////////////

// now apply the correct statistical method according to model_type...

tsset time

local rho_est = .

local rho_est_cil = .

local rho_est_ciu = .

local model_error = 0

if "`model_type'" == "regress" { // basic OLS regression

regress outcome `variables', nocons

matrix local_results = r(table)

local rho_est = 0

local num_iterations = 1

local error_code = _rc

local converged = 1

} // end regress check

else if "`model_type'" == "newey" { // OLS regression with newey-west standard errors

newey outcome `variables', nocons lag(1) force // need force option to ignore missing values otherwise get time not equally spaced errors

matrix local_results = r(table)

local varlist = "outcome `variables'"

quietly find_rho_wrap `varlist'

local rho_est = rho

local num_iterations = 1

local error_code = _rc

local converged = 1

newey outcome `variables', nocons lag(1) force // need force option to ignore missing values otherwise get time not equally spaced errors

} // end newey check

else if "`model_type'" == "prais" { // Prais-Winsten with iterative search

cap prais outcome `variables', nocons ssesearch

if _rc != 0 {

local model_error = _rc

matrix local_results = J(6,5,.)

local rho_est = .

local converged = .

local num_iterations = e(ic)

local error_code = _rc

}

else {

matrix local_results = r(table)

local rho_est = e(rho)

local num_iterations = e(ic)

local error_code = _rc

local converged = 1

}

} // end prais check

else if "`model_type'" == "prais_raw" { // standard Prais-Winsten

cap prais outcome `variables', nocons

if _rc != 0 {

local model_error = _rc

matrix local_results = J(6,5,.)

local rho_est = .

local converged = .

local num_iterations = e(ic)

local error_code = _rc

}

else {

matrix local_results = r(table)

local rho_est = e(rho)

local num_iterations = e(ic)

local error_code = _rc

local converged = 1

}

} // end prais_raw check

else if "`model_type'" == "corc" { // Cochrane-Orcutt

cap prais outcome `variables', nocons corc ssesearch

if _rc != 0 {

local model_error = _rc

matrix local_results = J(6,5,.)

local rho_est = .

local converged = .

local num_iterations = e(ic)

local error_code = _rc

}

else {

matrix local_results = r(table)

local rho_est = e(rho)

local num_iterations = e(ic)

local error_code = _rc

local converged = 1

}

} // end corc check

else if "`model_type'" == "mixed" { // REML with maximum iterations set to 1000 to stop really long non-convergence

cap mixed outcome `variables', nocons res(ar 1, t(time)) var reml iter(1000)

if _rc != 0 {

local model_error = _rc

matrix local_results = J(6,5,.)

local rho_est = .

local converged = e(converged)

local num_iterations = e(ic)

local error_code = _rc

}

else {

matrix local_results = r(table)

local num_cols = colsof(local_results)

local rho_est = tanh(local_results[1,`num_cols'])

local rho_est_cil = tanh(local_results[5,`num_cols'])

local rho_est_ciu = tanh(local_results[6,`num_cols'])

local converged = e(converged)

local num_iterations = e(ic)

local error_code = _rc

}

} // end mixed check

else if "`model_type'" == "mixed_kr" { // REML with KR adjustment

cap mixed outcome `variables', nocons res(ar 1, t(time)) var reml iter(1000) dfmethod(kr)

if _rc != 0 {

local model_error = _rc

matrix local_results = J(6,5,.)

local rho_est = .

local converged = e(converged)

local num_iterations = e(ic)

local error_code = _rc

}

else {

matrix local_results = r(table)

local num_cols = colsof(local_results)

local rho_est = tanh(local_results[1,`num_cols'])

local rho_est_cil = tanh(local_results[5,`num_cols'])

local rho_est_ciu = tanh(local_results[6,`num_cols'])

local converged = e(converged)

local num_iterations = e(ic)

local error_code = _rc

mat dfs = e(df)

}

} // end mixed_kr check

else if "`model_type'" == "mixed_satt" { // REML with Satt adjustment

cap mixed outcome `variables', nocons res(ar 1, t(time)) var reml iter(1000) dfmethod(satt)

if _rc != 0 {

local model_error = _rc

matrix local_results = J(6,5,.)

local rho_est = .

local converged = e(converged)

local num_iterations = e(ic)

local error_code = _rc

}

else {

display "`model_type' model ran"

matrix local_results = r(table)

local num_cols = colsof(local_results)

local rho_est = tanh(local_results[1,`num_cols'])

local rho_est_cil = tanh(local_results[5,`num_cols'])

local rho_est_ciu = tanh(local_results[6,`num_cols'])

local converged = e(converged)

local num_iterations = e(ic)

local error_code = _rc

mat dfs = e(df)

}

} // end mixed_satt check

else if "`model_type'" == "arima" {

cap arima outcome `variables', nocons collinear ar(1) iter(1000)

if _rc != 0 {

// new section for error catch includes a "slow down" as for some reason

// Stata sometimes crashes if it went too quickly here (Stata 15.0)

local model_error = _rc

local iteration = 1

while `iteration' < 10 & _rc != 0 {

cap matrix local_results = J(6,5,.)

local rho_est = .

local converged = e(converged)

local num_iterations = e(ic)

local error_code = _rc

sleep 10

local iteration = `iteration' + 1

}

}

else {

matrix local_results = r(table)

local num_cols = colsof(local_results)

local rho_col = `num_cols' - 1

local rho_est = (local_results[1,`rho_col'])

local rho_est_cil = (local_results[5,`rho_col'])

local rho_est_ciu = (local_results[6,`rho_col'])

local converged = e(converged)

local num_iterations = e(ic)

local error_code = _rc

}

} // end arima check

else {

display "Model type `model_type' is not recognised"

stop

}

display "study: `year' number: `number_in_year' multiple: `multiple' data_type: `data_type' model `model_type' ran with error code `model_error'"

// if there was an error just set the output to missing values

if `model_error' != 0 {

forvalues segment = 0/`num_segments' {

local level_change_counter_`segment' = .

local level_change_counter_`segment'_ll = .

local level_change_counter_`segment'_ul = .

local level_change_counter_`segment'_se = .

local level_change_counter_`segment'_p = .

local slope_change_counter_`segment' = .

local slope_change_counter_`segment'_ll = .

local slope_change_counter_`segment'_ul = .

local slope_change_counter_`segment'_se = .

local slope_change_counter_`segment'_p = .

}

}

else {

// use lincom to find the CIs that go with the various level and slope changes

// predict the estimates to find the counterfactual, level change etc.

// base estimates of level change compared to first segment

predict estimates

gen counterfactual = _b[level_change_0] + _b[slope_change_0]*slope_change_0

// if satterthwaite is used need to add ",small" to the options after lincom

if "`model_type'" == "mixed_satt" {

local small " , small"

}

else {

local small ""

}

////////////////////////////////////////////////////////////////////////////////

// level changes from counterfactual

// for each segment...

forvalues segment = 0/`num_segments' {

// for the first segment just initialise everything

if `segment' == 0 {

local level_change_counter_`segment' = .

local level_change_counter_`segment'_ll = .

local level_change_counter_`segment'_ul = .

local level_change_counter_`segment'_se = .

local level_change_counter_`segment'_p = .

}

else {

// for each subsequent segment

// set up a local macro that holds the names of all the lincom variables we want

// this is going to be

// level_change_1 for the first level change

// and then adding on the subsequent level and slope change values for any subsequent segments

forvalues segment_sub = 1/`segment' {

if `segment_sub' == 1 {

local L`segment' = `" level_change_`segment_sub' "'

}

else {

local segment_multiplier = slope_change_`=`segment_sub'-1'[`time_`segment'_start']

local L`segment' = `" `L`segment'' "' + `" + slope_change_`=`segment_sub'-1'*`segment_multiplier' + level_change_`segment_sub' "'

}

*display "L`segment' `L`segment''"

}

// now lincom those variables (adding the small option if using REML-Satt)

lincom `L`segment'' `small'

// lincom gives slightly different responses in different situations...

if "`model_type'" == "arima" | "`model_type'" == "mixed" {

local lincom_level_dof = e(N) - e(df_m)

}

else {

local lincom_level_dof = r(df)

}

*return list

display "level lincom dof = `lincom_level_dof'"

// we are using a cut-off of 2 for the degrees of freedom for the REML-Satt method

if `lincom_level_dof' < 2 & "`model_type'" == "mixed_satt" {

lincom `L`segment'', df(2)

}

// now save those values

local level_change_counter_`segment' = r(estimate)

local level_change_counter_`segment'_ll = r(lb)

local level_change_counter_`segment'_ul = r(ub)

local level_change_counter_`segment'_se = r(se)

local level_change_counter_`segment'_p = r(p)

} // end if loop

} // end segment loop

////////////////////////////////////////////////////////////////////////////////

// slope changes from counterfactual

// this runs as the level change above, but for slope change values instead

forvalues segment = 0/`num_segments' {

if `segment' == 0 {

local slope_change_counter_`segment' = .

local slope_change_counter_`segment'_ll = .

local slope_change_counter_`segment'_ul = .

local slope_change_counter_`segment'_se = .

local slope_change_counter_`segment'_p = .

}

else {

forvalues segment_sub = 1/`segment' {

if `segment_sub' == 1 {

local SC_`segment' = "slope_change_`segment_sub'"

}

else {

local SC_`segment' = "`SC_`segment''" + " + slope_change_`segment_sub'"

}

}

lincom `SC_`segment'' `small'

if "`model_type'" == "arima" | "`model_type'" == "mixed" {

local lincom_slope_dof = e(N) - e(df_m)

}

else {

local lincom_slope_dof = r(df)

}

*return list

display "slope lincom dof = `lincom_slope_dof'"

if `lincom_slope_dof' < 2 & "`model_type'" == "mixed_satt" {

lincom `SC_`segment'', df(2)

}

local slope_change_counter_`segment' = r(estimate)

local slope_change_counter_`segment'_ll = r(lb)

local slope_change_counter_`segment'_ul = r(ub)

local slope_change_counter_`segment'_se = r(se)

local slope_change_counter_`segment'_p = r(p)

} // end if loop

} // end segment loop

} // end model error check.

////////////////////////////////////////////////////////////////////////////////

// postvalues

// finally put the values into the post file

forvalues segment = 0/`num_segments' {

local analysis_autocorr = analysis_autocorr[`time_`segment'_start']

// in the excel file the segments begin with 1, in this file we set to zero

// therefore we need to similarly reduce the analysis effects by 1 so they all match up

local analysis_effects = analysis_effects[`time_`segment'_start'] - 1

summ time if segment == `segment'

local segment_num_points = r(N)

// scaled adjustment by rmse

local level_change_counter_`segment' = `level_change_counter_`segment''/`rmse'

local level_change_counter_`segment'_ll = `level_change_counter_`segment'_ll'/`rmse'

local level_change_counter_`segment'_ul = `level_change_counter_`segment'_ul'/`rmse'

local level_change_counter_`segment'_se = `level_change_counter_`segment'_se'/`rmse'

local slope_change_counter_`segment' = `slope_change_counter_`segment''/`rmse'

local slope_change_counter_`segment'_ll = `slope_change_counter_`segment'_ll'/`rmse'

local slope_change_counter_`segment'_ul = `slope_change_counter_`segment'_ul'/`rmse'

local slope_change_counter_`segment'_se = `slope_change_counter_`segment'_se'/`rmse'

post `post_values_`model_type'' (`series_id') ///

("`model_type'") ///

(`segment') (`analysis_autocorr') (`analysis_effects') (`segment_num_points') (`total_num_points') (`rmse') ///

(`level_change_counter_`segment'') (`level_change_counter_`segment'_ll') (`level_change_counter_`segment'_ul') (`level_change_counter_`segment'_se') (`level_change_counter_`segment'_p') /// ///

(`slope_change_counter_`segment'') (`slope_change_counter_`segment'_ll') (`slope_change_counter_`segment'_ul') (`slope_change_counter_`segment'_se') (`slope_change_counter_`segment'_p') ///

(`rho_est') (`rho_est_cil') (`rho_est_ciu') ///

(`num_iterations') (`error_code') (`converged') (`lincom_level_dof') (`lincom_slope_dof')

} // end segment loop

restore

} // end study id loop

postclose `post_values_`model_type''

} // end of model type loop

- 1. Data file 3: combine_methods_published.do

////////////////////////////////////////////////////////////////////////////////

// This is the analysis file for the empirical study:

// "Comparison of six statistical methods for interrupted time series studies: empirical evaluation of 190 published series"

// this do file combines the results for all the different statistical methods

// the combined file is called estimates_published_all.dta

local model_types "regress newey prais_raw mixed mixed_satt arima"

local first = 0

foreach model of local model_types {

if `first' == 0 {

use "estimates_published_`model'.dta", clear

local first = 1

}

else {

append using "estimates_published_`model'.dta"

}

}

save estimates_published_all.dta, replace

- 1. Data file 4: get_wanted_empirical_estimates_published.do

////////////////////////////////////////////////////////////////////////////////

// This is the final do file for the empirical study:

// "Comparison of six statistical methods for interrupted time series studies: empirical evaluation of 190 published series"

// It selects the effect estimate wanted for final comparisons

// excluding segments that are not required (e.g. transition periods)

// It requires the data from STurner_Empirical_study_information which contains the desired segment number

// The final file "empirical_estimates_published.dta" is the output

// keep only the segments we need

keep if segment == analysis_effects

// tidy the file

sort series_id model_type segment

order series_id model_type segment segment_num_points total_num_points

// save the final data file

save empirical_estimates_published.dta, replace
